# Supplementary material for: Liquid crystal-refilled polymer network templates formed by photo-polymerisation in an orientationally ordered liquid crystal
Source: Royal Society of Chemistry journal article supplement (doi:10.1039/d5tc00641d), 2025-01-01
Supplement: d5tc00641d1.pdf [file d5tc00641d1.pdf]

Electronic Supplementary Information

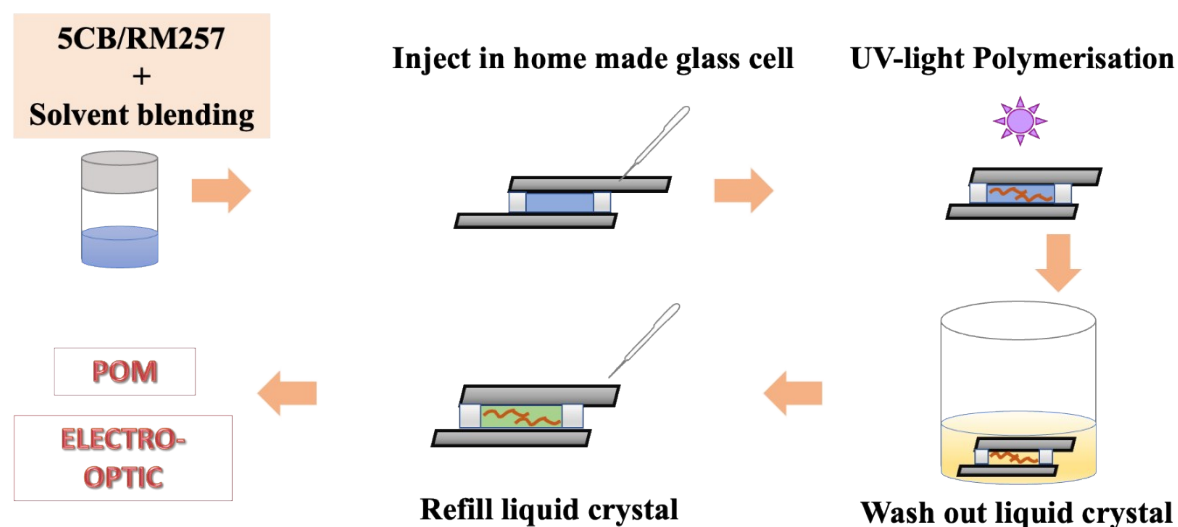

Fig.S1: Schematic illustration of the sample preparation also known as the wash out / refill procedure.

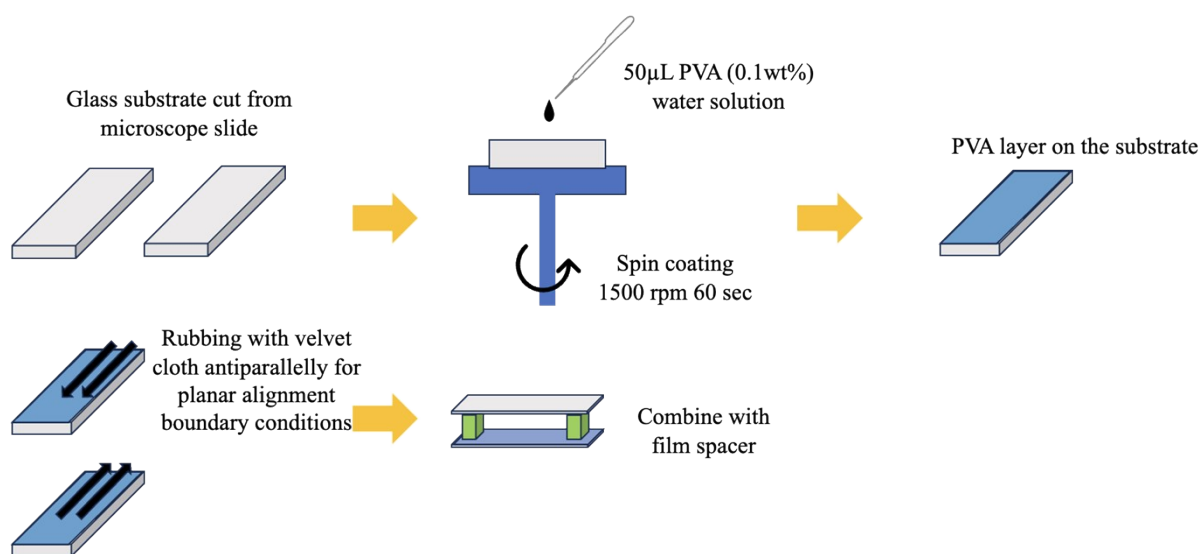

Fig.S2: Schematic illustration of the sandwich cell assembly and boundary conditions preparation steps.

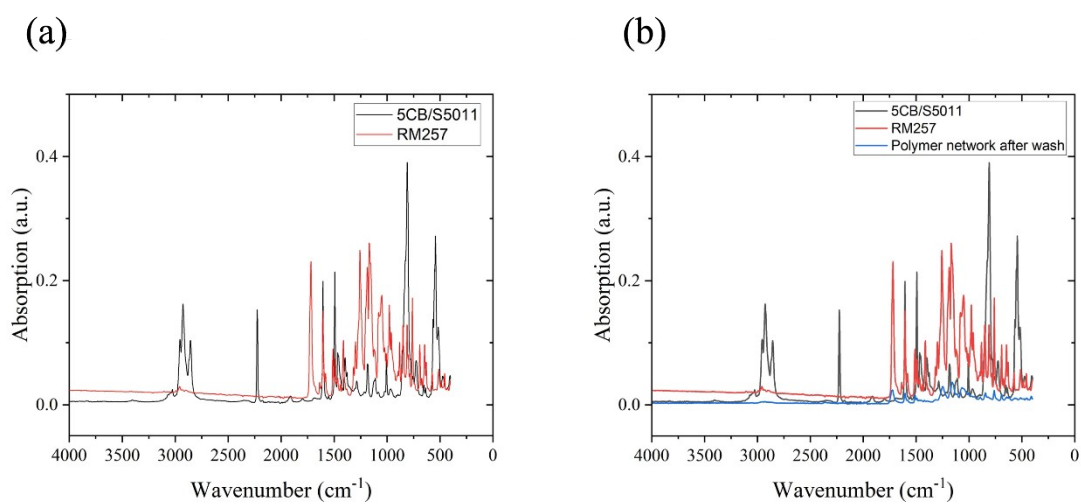

Fig.S3: FTIR spectra of (a) 5CB/S5011 mixture and RM257, (b) 5CB/S5011 mixture, RM257, and the polymer network after washing out the liquid crystal from the PSLC.

Table S1: The concentration of PSLC (5CB/RM257/S5011) and refilled LC (5CB/R5011).

| Dopant (wt%) | 5CB (mg) | RM257 (mg) | S(R)5011 1% solution (mg) | Actual dopant (%) |
|--------------|----------|------------|---------------------------|-------------------|
| 0.7          | 83.33    | 2.52       | 66.40                     | 0.77              |
|              | 78.43    | X          | 53.01                     | 0.67              |
| 1.0          | 65.79    | 2.01       | 68.08                     | 0.99              |
|              | 43.40    | X          | 45.36                     | 1.03              |
| 1.2          | 65.35    | 2.03       | 83.42                     | 1.22              |
|              | 43.86    | X          | 54.62                     | 1.23              |
| 1.5          | 76.32    | 2.33       | 116.09                    | 1.45              |
|              | 47.97    | X          | 75.04                     | 1.47              |

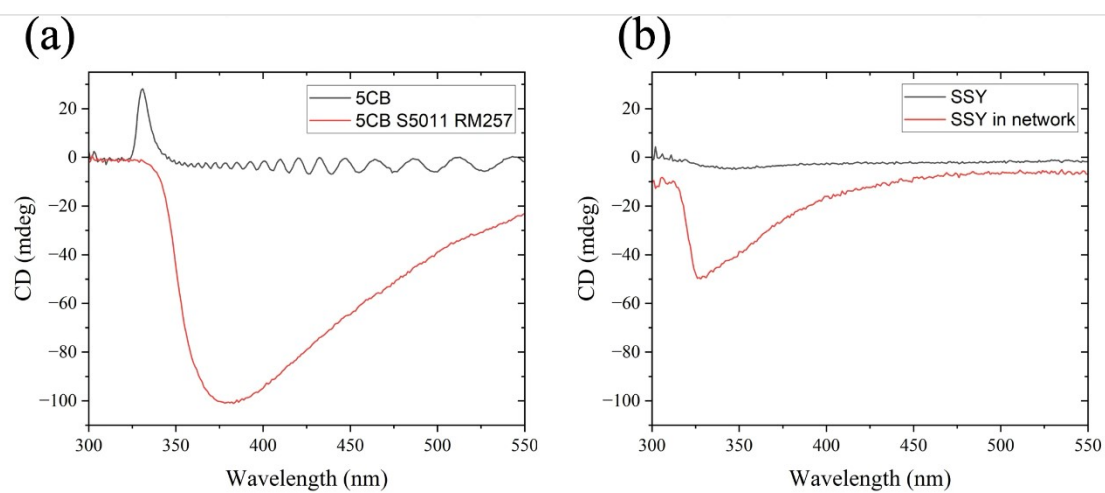

Fig.S4: Circular dichroism (CD) measurements of (a) 5CB and 5CB/S5011/RM257 mixture, (b) SSY/water (25/75) and SSY/water refilled into the polymer network.
